# Supplementary material for: Clinical and Radiographic Evaluation of Nanohydroxyapatite Powder in Combination with Polylactic Acid/Polyglycolic Acid Copolymer as Bone Replacement Graft in the Surgical Treatment of Intrabony Periodontal Defects: A Retrospective Case Series Study
Source: PubMed Central journal article supplement (PMC7014298; doi:10.3390/ma13020269), 2020-01-07
Supplement: materials-13-00269-s001.pdf [file materials-13-00269-s001.pdf]

Supplementary

# Clinical and Radiographic Evaluation of Nanohydroxyapatite Powder in Combination with Polylactic Acid/Polyglycolic Acid Copolymer as Bone Replacement Graft in the Surgical Treatment of Intra-bony Periodontal Defects: A Retrospective Case Series Study

Simone Verardi <sup>1</sup>, Teresa Lombardi <sup>2</sup> and Claudio Stacchi <sup>3,\*</sup>

**Table S1.** Distribution of treated sites and clinical outcomes.

| Patient No.   | Tooth | PD            |               |                   | CAL           |               |               |
|---------------|-------|---------------|---------------|-------------------|---------------|---------------|---------------|
|               |       | Baseline (mm) | 12-month (mm) | PD reduction (mm) | Baseline (mm) | 12-month (mm) | CAL gain (mm) |
| 1             | 43    | 11            | 4             | 7                 | 12            | 7             | 5             |
| 2             | 32    | 9             | 5             | 4                 | 10            | 7             | 3             |
| 3             | 44    | 7             | 4             | 3                 | 9             | 7             | 2             |
| 4             | 31    | 9             | 4             | 5                 | 12            | 10            | 2             |
| 5             | 11    | 12            | 4             | 8                 | 14            | 11            | 3             |
| 6             | 12    | 8             | 2             | 6                 | 10            | 5             | 5             |
| 7             | 11    | 8             | 4             | 4                 | 10            | 7             | 3             |
| 8             | 21    | 11            | 4             | 7                 | 13            | 8             | 5             |
| 9             | 46    | 8             | 4             | 4                 | 11            | 7             | 4             |
| 10            | 44    | 8             | 3             | 5                 | 9             | 4             | 5             |
| 11            | 36    | 9             | 4             | 5                 | 11            | 5             | 6             |
| 12            | 46    | 8             | 5             | 3                 | 10            | 6             | 4             |
| 13            | 35    | 7             | 3             | 4                 | 8             | 4             | 4             |
| 14            | 14    | 7             | 3             | 4                 | 9             | 6             | 3             |
| 15            | 15    | 7             | 4             | 3                 | 8             | 5             | 3             |
| 16            | 35    | 7             | 4             | 3                 | 11            | 6             | 5             |
| 17            | 15    | 8             | 4             | 4                 | 8             | 6             | 2             |
| 18            | 26    | 10            | 6             | 4                 | 12            | 7             | 5             |
| 19            | 46    | 8             | 5             | 3                 | 9             | 6             | 3             |
| 20            | 16    | 9             | 4             | 5                 | 10            | 5             | 5             |
| 21            | 36    | 8             | 4             | 4                 | 9             | 6             | 3             |
| 22            | 43    | 8             | 5             | 3                 | 10            | 7             | 3             |
| 23            | 15    | 7             | 5             | 2                 | 8             | 6             | 2             |
| 24            | 43    | 7             | 4             | 3                 | 8             | 4             | 4             |
| 25            | 16    | 7             | 3             | 4                 | 8             | 4             | 4             |
| <b>Mean</b>   |       | 8.32          | 4.04          | 4.28              | 9.96          | 6.24          | 3.72          |
| <b>SD (±)</b> |       | 1.41          | 0.84          | 1.46              | 1.69          | 1.71          | 1.17          |

PD: probing depth; CAL: clinical attachment level; No.: number; mm: millimeters; SD: standard deviation.

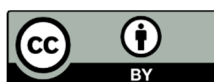

© 2020 by the authors. Submitted for possible open access publication under the terms and conditions of the Creative Commons Attribution (CC BY) license (<http://creativecommons.org/licenses/by/4.0/>).
